# Supplementary material for: Enhanced Catalytic Activity of a Coal-Based Powdered Activated Carbon by Thermal Treatment
Source: MDPI journal article supplement (doi:10.3390/w14203308), 2022-10-19
Supplement: s1 [file s1]

## Enhanced Catalytic Activity of a Coal-Based Powdered Activated Carbon by Thermal Treatment

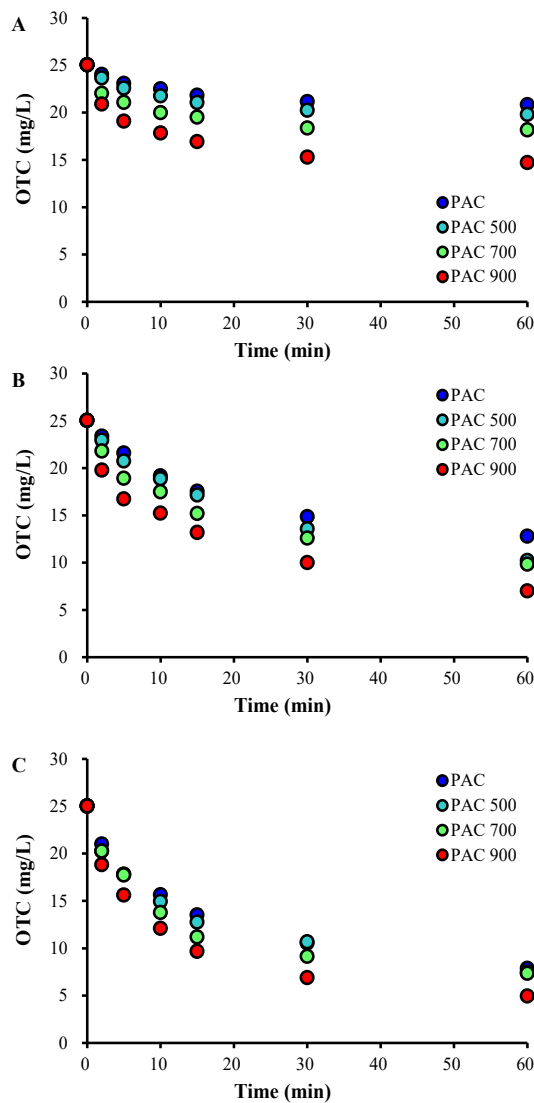

**Figure S1.** OTC removal using various PACs (A) in the absence of an oxidant and in the presence of (B) PDA and (C) PMS (PACs 0.1 g/L, PDS or PMS 1 mM, OTC 25 mg/L, initial pH 6.0, 20±2 °C).

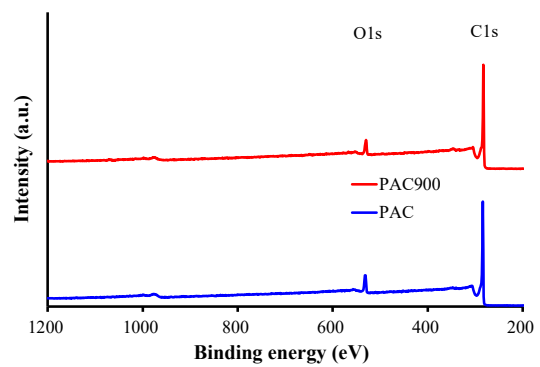

Figure S2. XPS survey spectra of PAC and PAC900.

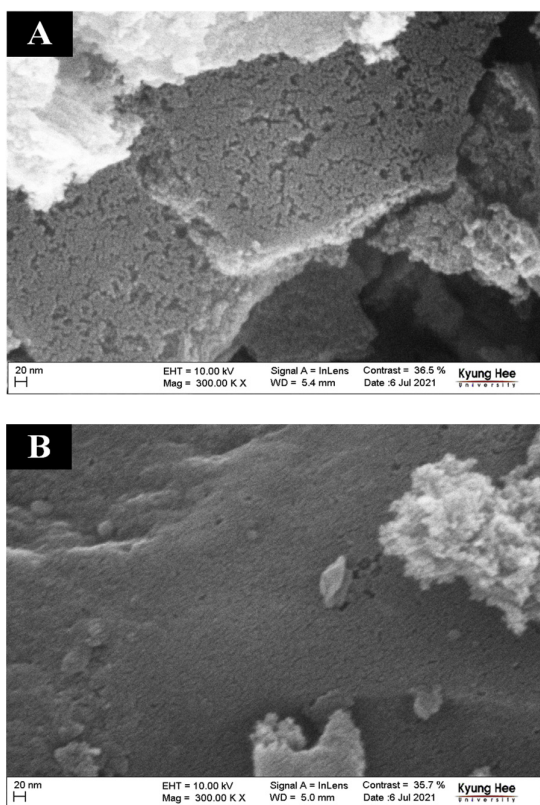

Figure S3. SEM images of (A) PAC and (B) PAC900.

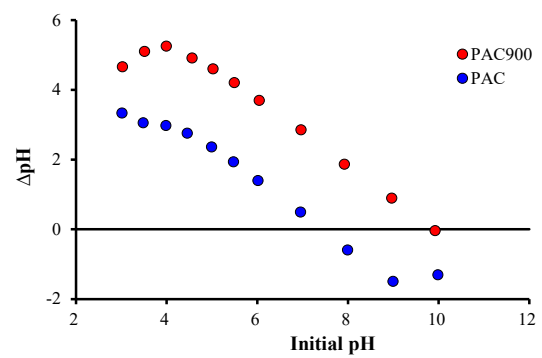

**Figure S4.** Point of zero charge ( $\text{pH}_{\text{pzc}}$ ) of PAC and PAC900.

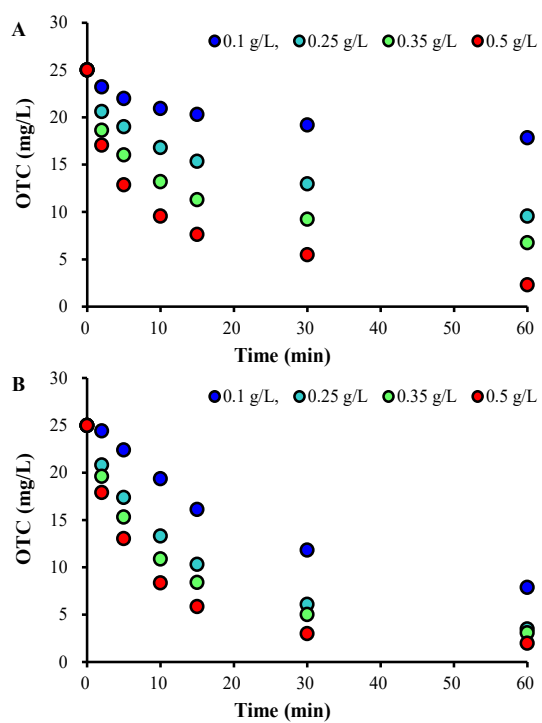

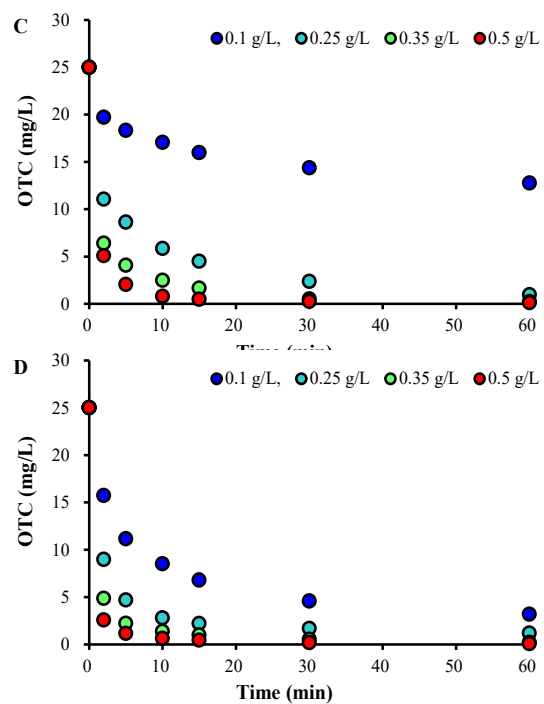

**Figure S5.** OTC removal at different PACs dose in (A) PAC, (B) PAC+PMS, (C) PAC900, and (D) PAC900+PMS (PMS 1 mM, OTC 25 mg/L, initial pH 6.0).

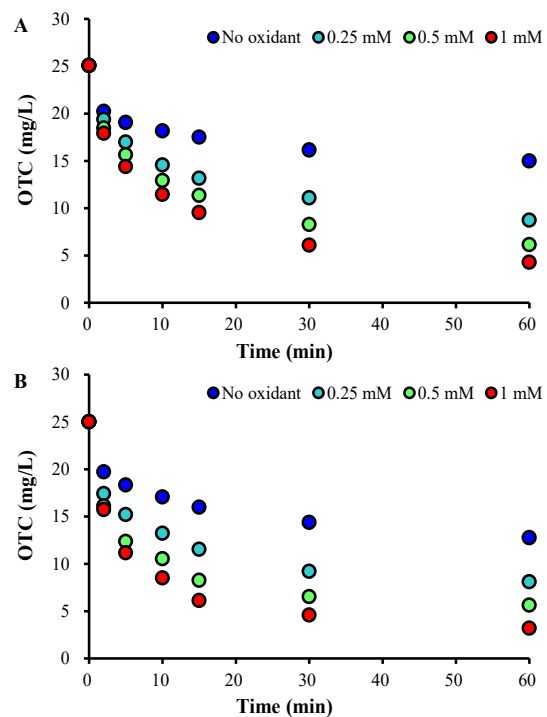

**Figure S6.** OTC removal at different PMS dose in (A) PAC +PMS and (B) PAC900+PMS (PACs 0.1 g/L, OTC 25 mg/L, initial pH 6.0).
